# Supplementary material for: Soybean GmDREBL Increases Lipid Content in Seeds of Transgenic Arabidopsis
Source: PubMed Central journal article supplement (PMC5046110; doi:10.1038/srep34307), 2016-10-03
Supplement: srep34307-s1.pdf [file srep34307-s1.pdf]

# **Soybean GmDREBL Increases Lipid Content in Seeds of Transgenic *Arabidopsis***

**Running title: *GmDREBL* increases lipid content in seeds**

Yu-Qin Zhang<sup>1,2</sup>, Xiang Lu<sup>1,2</sup>, Fei-Yi Zhao<sup>3</sup>, Qing-Tian Li<sup>1</sup>, Su-Ling Niu<sup>1</sup>, Wei Wei<sup>1</sup>, Wan-Ke Zhang<sup>1</sup>, Biao Ma<sup>1</sup>, Shou-Yi Chen<sup>1\*</sup>, Jin-Song Zhang<sup>1\*</sup>

<sup>1</sup> State Key Laboratory of Plant Genomics, Institute of Genetics and Developmental Biology, Chinese Academy of Sciences, Chaoyang District, Beichen West Road, Campus #1, No.2, Beijing 100101, China; <sup>3</sup>School of Bioengineering & Biotechnology, Tianshui Normal University, Tianshui, Gansu 741000, China

<sup>2</sup> Contribute equally to the work.

\* To whom correspondence should be addressed. E-mail: [sychen@genetics.ac.cn](mailto:sychen@genetics.ac.cn) or [jszhang@genetics.ac.cn](mailto:jszhang@genetics.ac.cn)

# Figure S1

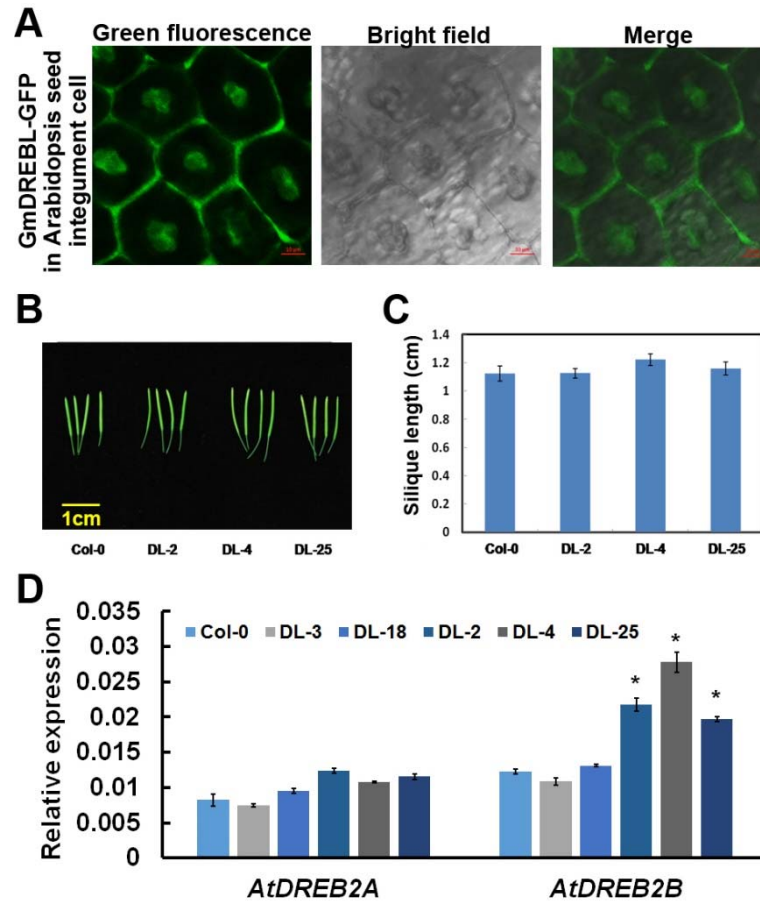

**Figure S1 GmDREBL-GFP localization in *GmDREBL-GFP* transgenic Arabidopsis seeds and silique length comparison.**

(A) GmDREBL-GFP localization in integument cells of *GmDREBL-GFP* transgenic Arabidopsis seeds. (B) The silique length of wild type Col-0 and transgenic plants with *GmDREBL-GFP*. The line stands for 1 cm. (C) The statistical result for the silique length of wild type Col-0 and transgenic plants with *GmDREBL-GFP*. Bars indicate SD (n=200). (D) The expression of *AtDREB2A* and *AtDREB2B* in *GmDREBL*-transgenic plants. \* indicate significant difference (p-value < 0.05).

## Figure S2

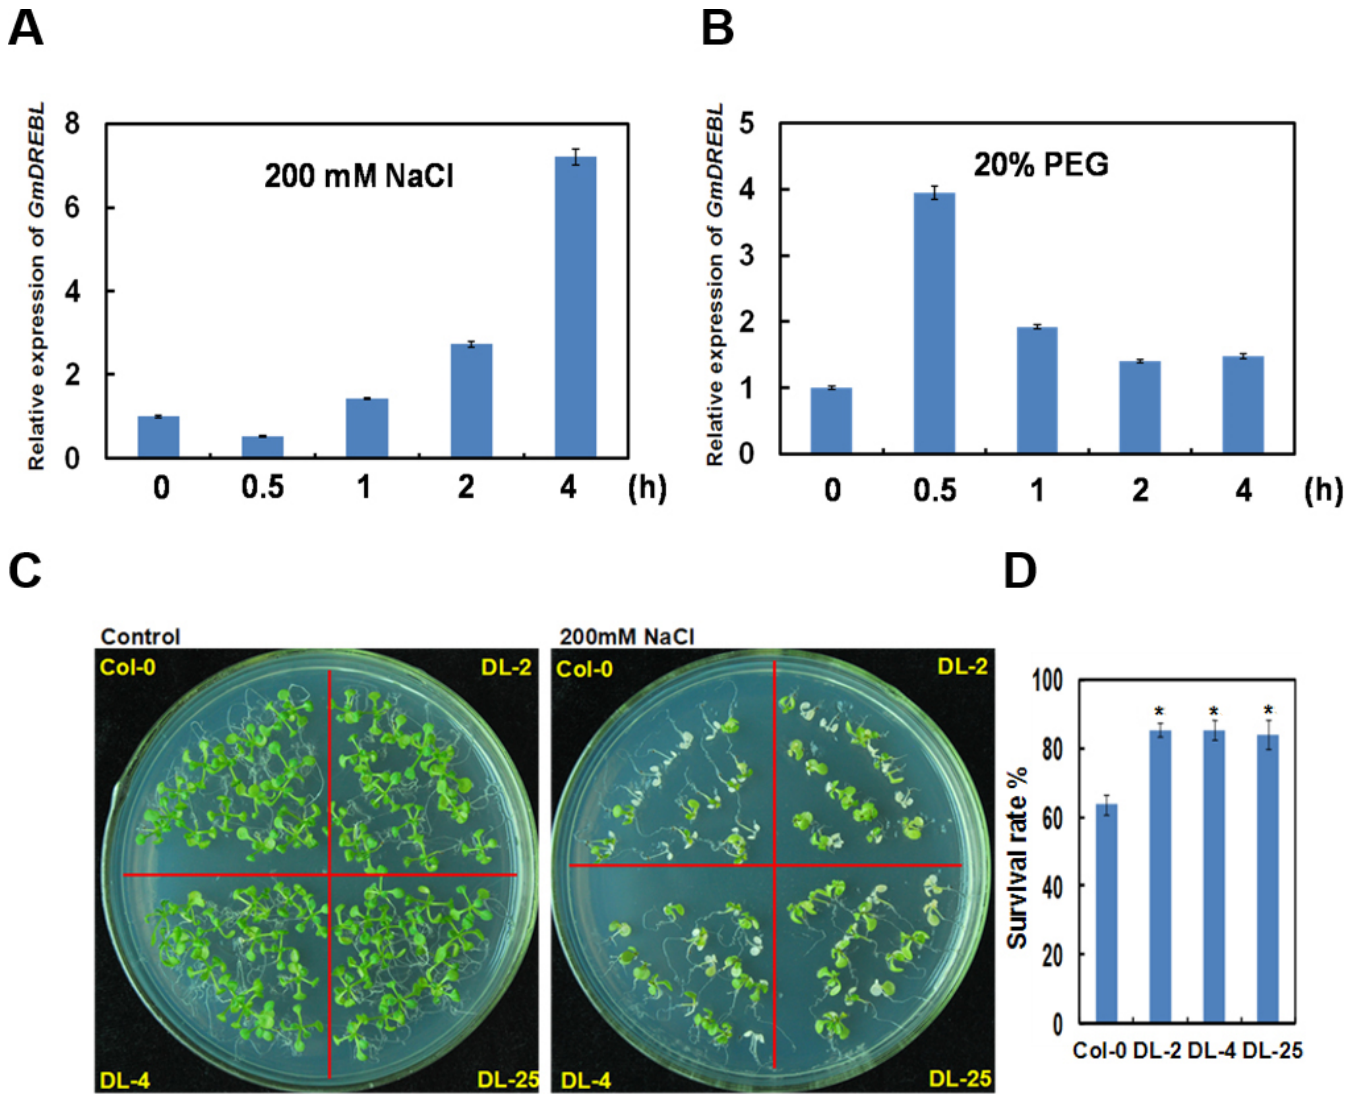

**Figure S2** The expression pattern of *GmDREBL* under different stress treatments.

(A) The expression of *GmDREBL* under 200mM NaCl treatment. (B) The expression of *GmDREBL* under 20%PEG treatment. (C) The phenotype of Col-0 and *GmDREBL*-overexpressing plants under normal condition and 200 mM NaCl treatment. (D) The survival rate of Col-0 is lower than that of *GmDREBL*-overexpressing plants under 200 mM NaCl treatment. Bars indicate SD (n=68). \* indicates significant difference ( $P < 0.05$ ).

Figure S3 **A**

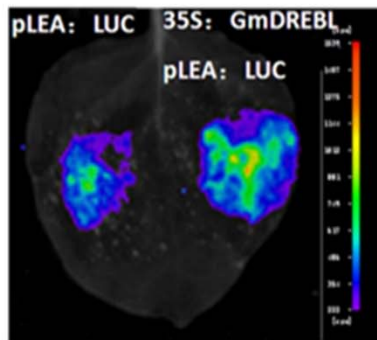

**B**

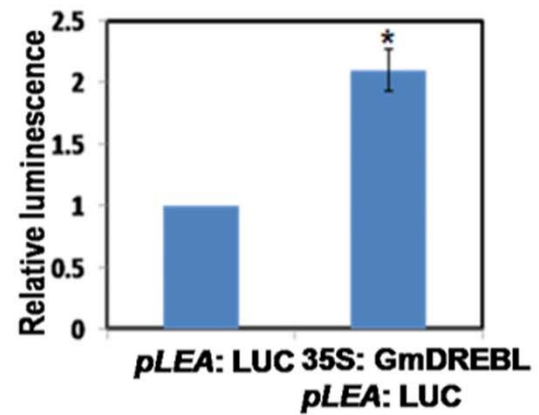

**C**

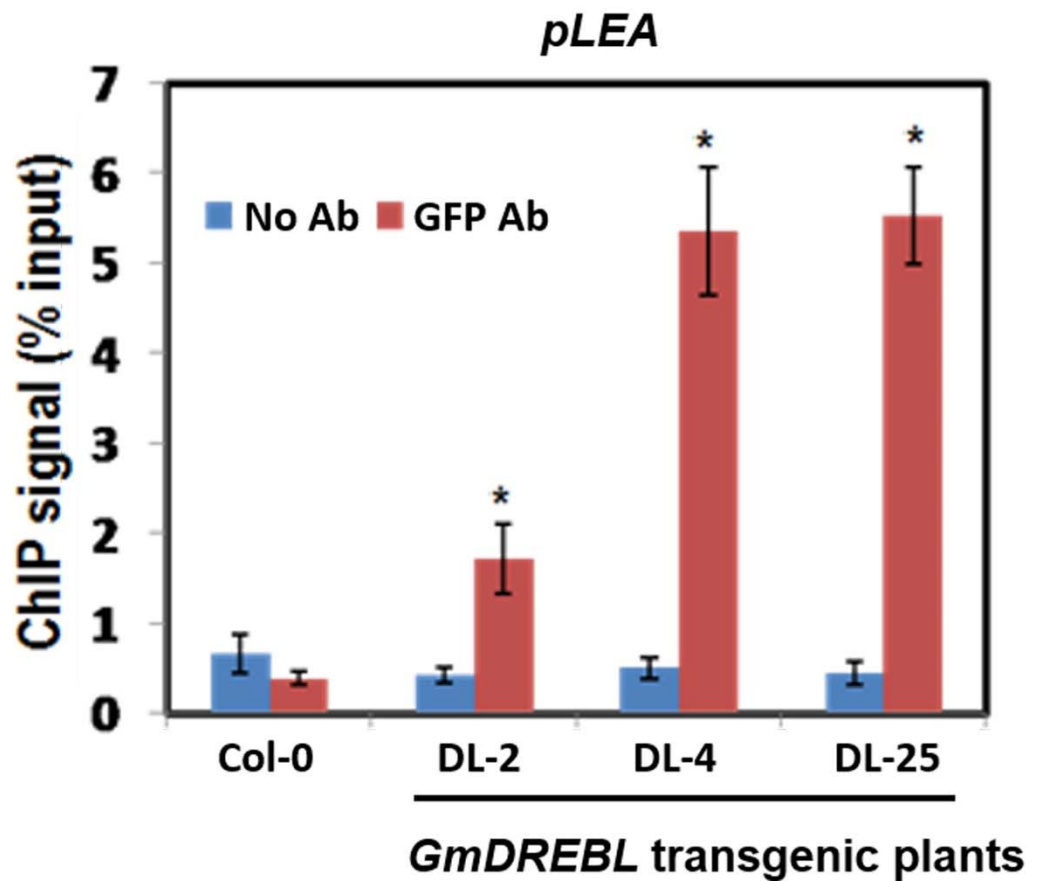

Figure S3 GmDREBL can directly bind to the promoter region of *LEA*.

(A) The LUC image of tobacco leaves co-infiltrated with GV3101 containing different combination of constructs. (B) Quantitative analysis of LUC luminescence intensity in (A). Asterisks indicate significant differences compared with the control ( $P < 0.05$ ). (C) The intensity of ChIP signal of Col-0 plants and *GmDREBL*-overexpressing plants with a GFP tag for GmDREBL. Bars indicate SD (n=4). \* indicate significant difference (p-value < 0.05).
